# Supplementary material for: Monitoring Early Glycolytic Flux Alterations Following Radiotherapy in Cancer and Immune Cells: Hyperpolarized Carbon-13 Magnetic Resonance Imaging Study
Source: MDPI journal article supplement (doi:10.3390/metabo11080518), 2021-08-06
Supplement: s1 [file s1]

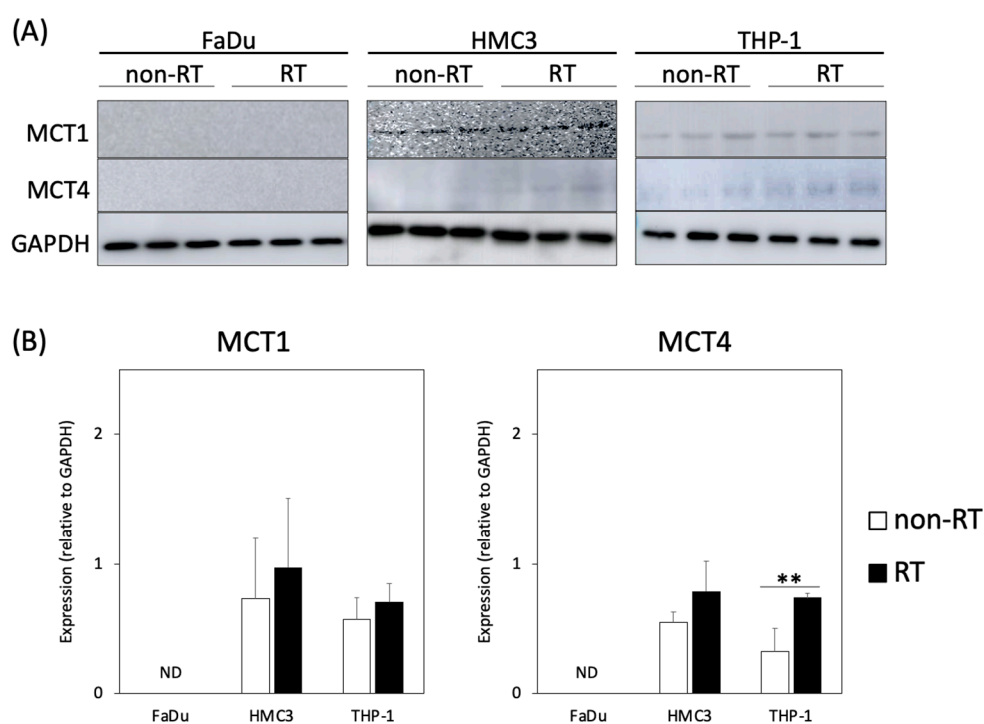

**Figure S1.** Analysis of the expressions of MCT1 and MCT4 in the non-irradiated (non-RT) and irradiated (RT) cancer and immune cells. (A) Western blot analyses of MCT1 and MCT4 in FaDu, HMC3, and THP-1 cells. GAPDH was used as a loading control. (B) Comparison of the expressions of MCT1 and MCT4 between the non-irradiated and irradiated cells (\*\*  $P < 0.01$ ). Note—MCT, monocarboxylate transporter; GAPDH, glyceraldehyde-3-phosphate dehydrogenase; ND, not detectable.
